# Supplementary material for: Theoretical investigation of electronic structures, second-order NLO responses of cyclometalated Ir(iii) and Rh(iii) counterpart complexes: effect of metal centers
Source: Royal Society of Chemistry journal article supplement (doi:10.1039/d2nj01659a), 2022-01-01
Supplement: d2nj01659a1.pdf [file d2nj01659a1.pdf]

**Theoretical investigation of electronic structures, second-order NLO responses of cyclometalated Ir(III) and Rh(III) counterpart complexes: effect of metal center**

Huiying Wang,<sup>a</sup> Jinting Ye,<sup>b</sup> Yongqing Qiu,<sup>c\*</sup> Feiwu Chen<sup>a\*</sup>

*a Department of Chemistry and Chemical Engineering, School of Chemistry and Biological Engineering, University of Science and Technology Beijing, Beijing 100083, China.*

*b College of Chemistry and Materials Science, Inner Mongolia University for the Nationalities, Tongliao 028000, China.*

*c Institute of Functional Material Chemistry, Faculty of Chemistry, Northeast Normal University, Changchun 130024, China.*

The solid phase molecule can be gained by using (PCM)-tuned method. The dielectric constant  $\varepsilon$  of solid-state molecular can be evaluated by the Clausius-Mossotti equation, which expressed as:

$$\frac{\varepsilon - 1}{\varepsilon + 2} = \frac{4\pi\alpha}{3V} \quad (1)$$

where  $V$  is the volume occupied by a single molecule,  $\alpha$  is the isotropic component of molecular polarizability. The  $V$  and  $\alpha$  calculated at B3LYP/6-31G(d)/SDD level and given in Table S1.

Experimentally, HRS is the most effective method to calculate the second-order NLO responses. The frequency-dependent first hyperpolarizability ( $\beta_{\text{HRS}}$ ) values are calculated at  $\omega$ B97XD/6-31+G(d)/SDD level in dichloromethane (DCM) solution as shown in Table S3. The  $\beta_{\text{HRS}}(-2\omega; \omega, \omega)$  that can be extracted from HRS data is described by Bersohn's expression:<sup>1,2</sup>

$$\beta_{\text{HRS}}(-2\omega; \omega, \omega) = \sqrt{\langle \beta_{\text{ZZZ}}^2 \rangle + \langle \beta_{\text{ZZX}}^2 \rangle} \quad (2)$$

Table S1 The volume ( $V$ , Bohr<sup>3</sup>), polarizabilities ( $\alpha$ , Bohr<sup>3</sup>) and dielectric constant ( $\epsilon$ ) simulated in the solid phase environment for all studied complexes

| Complex    | <b>Ir-1</b> | <b>Rh-1</b> | <b>Ir-2</b> | <b>Rh-2</b> | <b>Ir-3</b> | <b>Rh-3</b> | <b>Ir-4</b> | <b>Rh-4</b> |
|------------|-------------|-------------|-------------|-------------|-------------|-------------|-------------|-------------|
| $V$        | 3928.0      | 3922.1      | 5156.3      | 5151.6      | 5093.0      | 5090.1      | 4248.1      | 4240.7      |
| $\alpha$   | 397.6       | 391.7       | 482.8       | 478.2       | 540.7       | 532.3       | 408.5       | 404.0       |
| $\epsilon$ | 3.2         | 3.2         | 2.9         | 2.9         | 3.4         | 3.3         | 3.0         | 3.0         |

Table S2 Values of  $\beta_{\text{tot}}$  (a.u.) of all studied complexes calculated at various functionals

| Gas phase    |           |        |           |                |         |
|--------------|-----------|--------|-----------|----------------|---------|
| Complex      | BHandHLYP | M06-2X | CAM-B3LYP | $\omega$ B97XD | LC-BLYP |
| <b>Ir-1</b>  | 1221.0    | 1169.2 | 1414.8    | 1402.4         | 996.5   |
| <b>Rh-1</b>  | 738.9     | 695.7  | 855.0     | 837.6          | 605.3   |
| <b>Ir-2</b>  | 654.0     | 610.4  | 745.2     | 725.9          | 772.6   |
| <b>Rh-2</b>  | 356.6     | 274.8  | 443.0     | 461.3          | 525.8   |
| <b>Ir-3</b>  | 1405.1    | 1367.3 | 1556.8    | 1517.0         | 1131.2  |
| <b>Rh-3</b>  | 950.4     | 904.1  | 1030.0    | 981.8          | 751.6   |
| <b>Ir-4</b>  | 801.5     | 779.0  | 847.3     | 820.7          | 653.1   |
| <b>Rh-4</b>  | 599.4     | 581.9  | 613.6     | 586.0          | 476.8   |
| Liquid phase |           |        |           |                |         |
| Complex      | BHandHLYP | M06-2X | CAM-B3LYP | $\omega$ B97XD | LC-BLYP |
| <b>Ir-1</b>  | 1972.2    | 1884.0 | 2302.8    | 2278.5         | 1557.8  |
| <b>Rh-1</b>  | 1160.7    | 1063.5 | 1309.1    | 1272.6         | 907.0   |
| <b>Ir-2</b>  | 935.2     | 884.0  | 1147.3    | 1113.6         | 1247.2  |
| <b>Rh-2</b>  | 454.5     | 326.7  | 624.7     | 668.9          | 854.6   |
| <b>Ir-3</b>  | 2449.9    | 2385.7 | 2731.8    | 2668.6         | 1847.5  |
| <b>Rh-3</b>  | 1554.3    | 1456.0 | 1664.0    | 1562.1         | 1112.6  |
| <b>Ir-4</b>  | 1605.8    | 1519.5 | 1705.9    | 1646.6         | 1272.1  |
| <b>Rh-4</b>  | 1129.3    | 993.0  | 1127.4    | 1055.6         | 879.9   |
| Solid phase  |           |        |           |                |         |
| Complex      | BHandHLYP | M06-2X | CAM-B3LYP | $\omega$ B97XD | LC-BLYP |
| <b>Ir-1</b>  | 1727.4    | 1653.5 | 2013.0    | 1993.8         | 1380.1  |
| <b>Rh-1</b>  | 1028.0    | 953.6  | 1171.5    | 1142.5         | 817.6   |
| <b>Ir-2</b>  | 832.8     | 783.2  | 988.9     | 960.5          | 1053.9  |
| <b>Rh-2</b>  | 422.7     | 312.4  | 544.5     | 584.6          | 716.9   |
| <b>Ir-3</b>  | 2139.7    | 2084.7 | 2374.8    | 2316.6         | 1656.1  |
| <b>Rh-3</b>  | 1394.3    | 1316.0 | 1496.6    | 1413.5         | 1041.9  |
| <b>Ir-4</b>  | 1269.2    | 1214.5 | 1348.3    | 1304.0         | 1017.0  |
| <b>Rh-4</b>  | 907.3     | 831.8  | 917.8     | 867.0          | 714.1   |

Table S3 The values of  $\beta_{\text{HRS}}$  for all studied complexes calculated at  $\omega\text{B97XD/6-31+G(d)/SDD}$  level in liquid phase

| Complex     | 1064 nm | 1340 nm | 1460 nm | 1907 nm |
|-------------|---------|---------|---------|---------|
| <b>Ir-1</b> | 783.4   | 625.1   | 590.8   | 524.4   |
| <b>Rh-1</b> | 427.9   | 347.8   | 330.3   | 296.0   |
| <b>Ir-2</b> | 128.1   | 110.7   | 109.1   | 108.0   |
| <b>Rh-2</b> | 201.8   | 147.8   | 137.1   | 117.9   |
| <b>Ir-3</b> | 1357.0  | 1045.8  | 984.3   | 869.8   |
| <b>Rh-3</b> | 1061.7  | 834.6   | 788.1   | 700.7   |
| <b>Ir-4</b> | 715.7   | 578.0   | 548.5   | 491.7   |
| <b>Rh-4</b> | 511.4   | 425.8   | 407.4   | 371.8   |

## Reference

1. R. Bersohn, Y. H. Pao and H. L. Frisch, *J. Chem. Phys.*, 1966, **45**, 3184-3198.
2. F. Castet, E. Bogdan, A. Plaquet, L. Ducasse, B. Champagne and V. Rodriguez, *J. Chem. Phys.*, 2012, **136**, 024506.
